# Supplementary material for: Combination administration of alprazolam and N-Ethylmaleimide synergistically enhances sleep behaviors in mice with no potential CNS side effects
Source: PeerJ. 2024 May 7;12:e17342. doi: 10.7717/peerj.17342 (PMC11086308; doi:10.7717/peerj.17342)
Supplement: Data S1 [file peerj-12-17342-s004.xlsx]

## Sheet: Sheet1
Fig1A (Sleep latency)
Alp (mg/kg)	(min)
	NEM（0 mg/kg）								NEM（0.5 mg/kg）								NEM（1.0 mg/kg）								NEM（1.6 mg/kg）
0.8	60	60	60	60	60	60	60	60	44	30	40	32	47	46	31	37	37	42	43	37	38	38	46	41	41	46	38	42	35	37	33	28
1	60	60	60	60	60	60	60	60	43	41	36	27	38	30	29	20	32	41	24	23	27	29	23	25	14	23	40	44	25	27	34	33
1.4	49	50	45	43	60	38	50	60	34	31	27	26	28	29	29	29	35	30	32	30	27	34	28	26	31	22	19	30	30	28	21	30
1.6	31	30	45	39	42	33	60	46	30	22	32	36	25	28	20	20	16	8	16	34	31	13	23	16	13	23	19	27	12	17	7	16
Fig1B (sleep duration)
Alp (mg/kg)	(min)
	NEM（0 mg/kg）								NEM（0.5 mg/kg）								NEM（1.0 mg/kg）								NEM（1.6 mg/kg）
0.8	0	0	0	0	0	0	0	0	9	15	9	14	19	10	11	7	37	34	46	40	36	27	41	44	12	10	13	11	16	10	14	16
1	0	0	0	0	0	0	0	0	15	7	13	17	14	20	10	7	61	47	52	33	32	58	36	47	49	15	60	34	31	40	32	29
1.4	10	8	7	7	0	5	7	0	24	21	14	23	27	19	18	26	12	42	43	21	23	50	55	37	12	17	38	11	18	22	24	13
1.6	10	9	15	13	21	23	0	5	49	39	16	34	9	32	24	22	85	46	106	63	47	134	70	80	78	69	35	61	48	44	56	45
Fig1C (Sleep ratio)
Alp (mg/kg)	(%)
	NEM（mg/kg）
	0	1.6	1	0.5
0.8	0	33.33	33.33	0
1	0	66.67	61.6	16.67
1.4	16.67	83.33	83.33	33.33
1.6	33.33	100	100	83.33
Fig1D (Sleep ratio)
Alp (mg/kg)	(%)
	NEM（mg/kg）
	0	1.6	1	0.5
2.4	100
2.2	83.33
2	50	100	100	100
1.6	33.33			83.33
1.4	16.67	83.33	83.33	33.33
1	0	66.67	61.6	16.67
0.8		33.33	33.33	0
0.5		16.67	8.33
0.25		0	0
Fig2A (Wake)
Group	% Total time
Control	46.47	55.42	50.56	49.27	52.62	47.05	51.82	46.9
Alp	36.81	30.5	34.72	43.14	37.31	37.59	34.39	32.53
NEM	47.24	51.51	45.48	52.53	54.98	53.8	52.14	42.52
Alp@NEM	26.65	35.06	34.58	37.42	24.77	44.67	33.47	26.82
Fig2B (NREM)
Group	% Total time
Control	48.15	51.74	43.06	43.52	45.6	43.09	47.32	40.73
Alp	60.38	58.18	58.47	53.65	56.65	54.18	54.79	55.02
NEM	43.37	33.76	43.57	33.89	54	36.72	51.87	39.24
Alp@NEM	64.26	68.7	57.54	67.26	68.61	42.22	66.32	63.4
Fig2C (REM)
Group	% Total time
Control	4.17	2.69	3.87	3.88	3.14	3.75	3.49	4.31
Alp	6.7	5.07	5.22	4.28	5.46	6.12	6.02	5.74
NEM	3.76	4.19	4.13	4	4.21	3.79	4.04	3.52
Alp@NEM	9.74	8.07	9.44	9.96	7.89	10.16	8.13	8.87
Fig2E (immobility)
Group	(min)
Control	484.21	598.73	496.67	581.62	429.92	606.19
Alp	833.17	727.82	862.18	864.1	789.87	770.11
NEM	509.92	507.72	445.9	406.82	514.18	516.07
Alp@NEM	817.25	811.87	823.42	838.07	783.14	824.62
Fig3A (VLPO)
Group	(counts)
Control	12	15	38	11	13	8
Alp	185	70	136	73	99	29
NEM	59	30	50	27	58	16
Alp@NEM	53	135	90	46	75	132
Fig3B (TMN)
Group	(counts)
Control	34	36	26	24	20	36
Alp	15	20	26	20	18	16
NEM	16	18	4	9	8	10
Alp@NEM	6	8	6	12	10	6
Fig4A (climbing)
Group	(second)
Control	2468.3	798.3	1621.9	1611.3	2414.5	1628.2	882.6	1172.2
Alp-ED50	2688.8	1712.6	2065.1	1172.8	1538.2	1548.2	1871.9	955
Alp-ED95	578.5	411	523.5	238	1124	635.5	772.7	698.6
NEM	1402.5	2304.4	2196.2	360.5	1522.9	1464.9	846.1	1818.9
Alp-ED50@NEM	2458	2337.8	2552.7	1627.5	1205.1	1167.1	1259	2255.6
Fig4B (rear)
Group	(second)
Control	8544.1	4074.5	6541.2	7186.9	8014.8	8774.5	9324.2	5173.5
Alp-ED50	4576.2	5733.8	8974.1	8109.2	5575.5	7332.1	7040.2	4110.1
Alp-ED95	6847.2	6854.8	5641.2	4876.1	5822.2	3681.1	4973.1	6085.4
NEM	4989.6	6134.9	8207.7	4799.8	5746.3	3508.9	5926.8	4229.8
Alp-ED50@NEM	6265.3	5039.4	5420.1	3786.9	4785.2	5433	8245.8	6525
Fig4C (locomotion)
Group	(second)
Control	3787.8	4477.3	4580.9	3956.8	6037.4	4604.6	4252	5842.4
Alp-ED50	4972.5	5399.3	3867.9	4721.6	4729.7	3525.5	5394.6	2459.7
Alp-ED95	2883.7	2680.7	2365.2	3113.1	2290.3	2872.1	1738.4	2306.6
NEM	4945.5	3662.7	6763.1	2868.1	3967	4931.7	4923.1	4045.6
Alp-ED50@NEM	4264.6	5401.6	4961.9	3958.9	4912.4	5076.7	5765.4	4921.9
Fig4D (immobility)
Group	(s)
Control	32508.2	48106.1	72650	55635.6	44943.2	44736.4	46230.4	44714.5
Alp-ED50	51440.2	36549.7	45417.4	46490.2	51970.6	35312.1	41267.2	53466.5
Alp-ED95	73161.3	66664.7	67043.9	70571.7	61407.4	65996.5	73827.1	58158.7
NEM	58123.3	62105.5	41889.7	49058.2	37257.5	51418.2	33230	41588.5
Alp-ED50@NEM	34607.3	65717.5	48563.4	47864.3	46396.5	34767.5	51061.5	38377.4
Fig4E (distance)
Group	(m)
Control	290.4	208.7	95.4	193.7	222.3	236	350.8	201.3
Alp-ED50	103.4	222.2	97.8	227.6	204.9	336.8	232.8	310.2
Alp-ED95	202.3	90.6	80.8	145.7	56.5	164.9	20.3	151.8
NEM	78.5	237.3	186.2	244.2	213.5	183.1	159.6	130.3
Alp-ED50@NEM	155.9	220.6	251.1	231.3	198.7	176	295.4	190.1
Fig4F (speed)
Group	(mm/s)
Control	76.7	46.6	20.8	49	36.8	51.3	82.5	34.5
Alp-ED50	20.8	41.2	25.3	48.2	43.3	95.5	43.2	126.1
Alp-ED95	70.2	33.8	34.1	46.8	24.7	57.4	11.7	65.8
NEM	15.9	64.8	27.5	85.1	53.8	37.1	32.4	32.2
Alp-ED50@NEM	36.6	40.8	50.6	58.4	40.4	34.7	51.2	38.6
Fig5A (weight)
Group	%
Control	4.89	4.77	3.86	1.32	1.82	5.34	6.38	3.95
Alp-ED50	4.68	3.08	3.01	3.37	3.04	3.54	4.49	2.9
Alp-ED95	2.81	3.1	3.41	3.95	3.4	3.22	3.39	3.62
NEM	3.05	3.64	3.1	2.16	3.84	3.05	3.69	2.93
Alp-ED50@NEM	3.32	4.22	5.63	4.79	4.32	4.72	4.7	3.51
Fig5B (food)
Group	%
Control	8.4	10.25	10.73	13.1	7.93	14.57	10.32	11.89
Alp-ED50	6.43	7.92	7.26	10.46	9.35	10.77	5.81	9.79
Alp-ED95	2.69	4.16	2.79	2.92	4.03	3.34	3.31	2.08
NEM	12.47	17.08	11.11	13.72	12.3	9.78	12.35	14.62
Alp-ED50@NEM	9.43	9.04	7.84	9.48	9.39	8.23	9.87	8.05
Fig5C (water)
Group	%
Control	5.87	4.93	7.41	7.47	4.69	5.71	7.58	4.97
Alp-ED50	5.36	5.45	4.5	3.87	4.34	4.93	5.41	4.38
Alp-ED95	9.8	11.02	10.41	6.62	11.45	10.67	8.55	8.68
NEM	8.1	7.79	7.28	7.04	5.98	7	7.36	6.49
Alp-ED50@NEM	4.27	4.09	5.62	3.09	3.78	6.49	5.29	5.25
FigS3A (Wake)
Group	% Total time
Control	46.47	53.2	47.95	48.56	54.27	43.9	52.31	52.43
Alp-ED50	29.47	30.65	33.56	33.59	43.08	31.94	27.95	32.38
Alp-ED95	24.93	28.95	25.92	20.47	29.76	20.81	28.48	30.04
Alp-ED50@NEM	33.46	34.33	33.52	38.32	29.86	22.88	25.87	26.25
FigS3B (NREM)
Group	% Total time
Control	50.18	43.63	46.71	46.47	39.97	45.34	48.66	44.74
Alp-ED50	58.5	53.43	54.85	61.53	55.8	53.16	52.28	56.55
Alp-ED95	79.14	69.6	64.76	59.93	64.15	69.6	74.67	72.9
Alp-ED50@NEM	60.91	69.44	61.45	70.24	61.57	63.22	66.61	65.76
FigS3C (REM)
Group	% Total time
Control	4.08	4.04	3.25	3.6	3.8	3.43	2.8	4.07
Alp-ED50	4.84	5.91	6.48	6.45	7.15	6.04	5.23	5.7
Alp-ED95	10.14	9	8.7	9.07	6.58	7.68	8.69	9.18
Alp-ED50@NEM	10.6	9.49	9.45	10.4	9.83	10.64	6.41	10.05
